# Supplementary material
Source: PubMed Central journal article supplement (PMC2667765)
Supplement: M807272200_1.pdf [file M807272200_1.pdf]

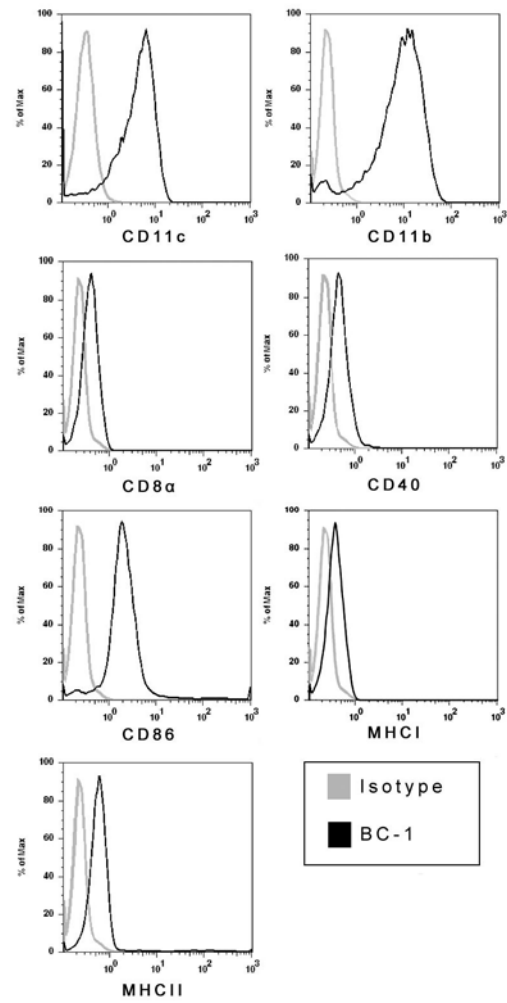

Fig. S1. Expression of surface markers on BC-1 DCs. The cells were stained with the antibodies mentioned in Experimental procedures or with the appropriate isotype control antibodies. Data were acquired by flowcytometric measurement of a total of  $3 \times 10^4$  cells per sample.

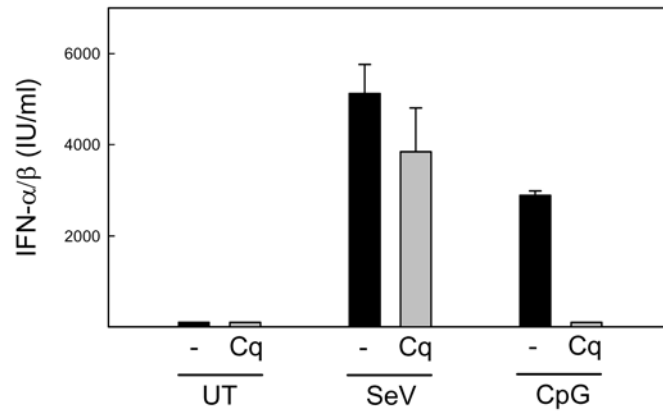

Fig. S2. Role of endosome maturation in SeV-induced type I expression. BC-1 DCs were treated with chloroquine (0.1 mM) 30 min prior to infection with SeV at MOI 1 or stimulation with CpG (1  $\mu$ M ODN1826). Cell culture supernatants were collected 12 h after infection and levels of bioactive type I IFN were determined. The data is shown as means of triplicates  $\pm$  st.dev. UT, untreated cells; Cq, chloroquine; CpG, ODN1826.

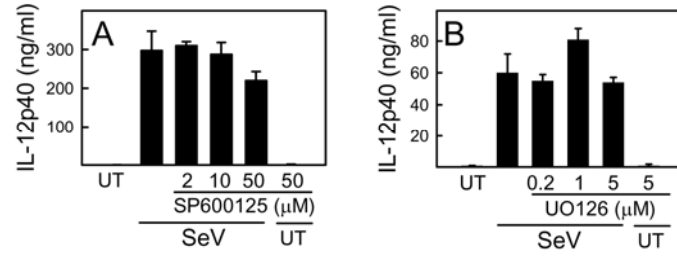

Fig. S3. Role of the JNK and MEK1/2-ERK pathways in SeV-induced IL-12 p40 production. BC-1 DCs were incubated in the presence of SP600125 (JNK inhibitor) or UO126 (MEK1/2 inhibitor) in the indicated doses for 30 min prior to infection with SeV at MOI 1. Cell culture supernatants were collected 12 h after infection and IL-12 p40 levels were determined. The data is shown as means of triplicates  $\pm$  St.dev. UT, untreated cells.

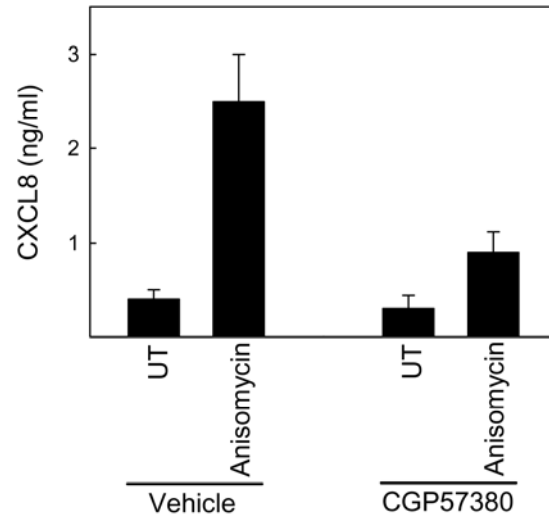

Fig. S4. Inhibition of MNK1 in HeLa cells. The cells were incubated in the presence of 30  $\mu$ M CGP57380 (MNK1 inhibitor) for 30 min prior to stimulation with 0.4  $\mu$ g/ml of anisomycin or vehicle control (DMSO). Cell culture supernatants were collected 18 h after infection and levels of CXCL8 were determined. The data is shown as means of triplicates  $\pm$  St.dev. UT, untreated cells.

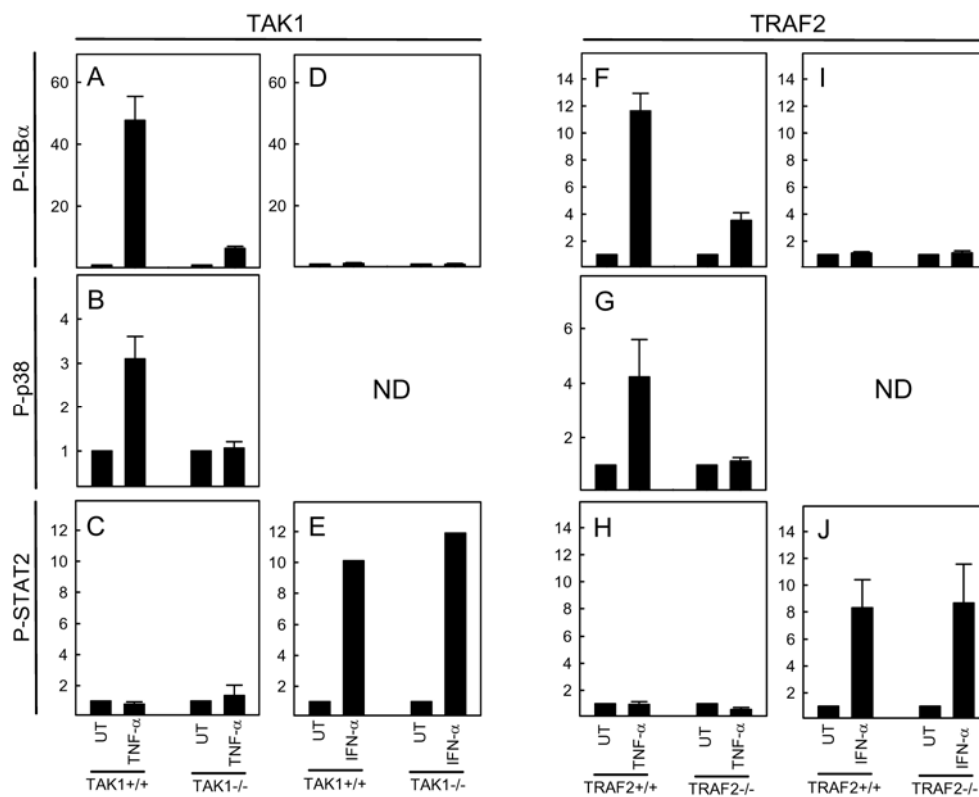

Fig. S5. Phosphorylation of IκBα, p38, and STAT2 in response to TNF-α and IFN-α, dependence on TAK1 and TRAF2. (A-E) TAK1<sup>+/+</sup> and TAK1<sup>-/-</sup> cells or (F-J) TRAF2<sup>+/+</sup> and TRAF2<sup>-/-</sup> cells were treated with TNF-α (25 ng/ml) or IFN-α (100 U/ml) as indicated. After 30 min of stimulation cell lysates were prepared and phosphorylation of IκBα, p38, and STAT2 was measured by Luminex. All data except panel E is shown as means of triplicates ± St.dev. UT, untreated cells. ND, not done.
